# Supplementary material for: Tetrathiafulvalene derivatives as cation sensor: density functional theory investigation of the hyper-Rayleigh scattering first hyperpolarizability
Source: Royal Society of Chemistry journal article supplement (doi:10.1039/c5ra00554j), 2015-01-01
Supplement: c5ra00554j1.pdf [file c5ra00554j1.pdf]

## Supporting Information

# Tetrathiafulvalene Derivatives as Cation Sensor: Density Functional Theory Investigation of the Hyper-Rayleigh Scattering First Hyperpolarizability

Chun-Guang Liu<sup>1\*</sup>, Ming-Li Gao<sup>1</sup>, Ding-Fan Zhang<sup>1</sup>, and Zhong-Min Su<sup>\*2</sup>

*1 College of Chemical Engineering, Northeast Dianli University, Jilin 132012, Jilin  
Province, P. R. China;*

*2 Institute of Functional Material Chemistry, Faculty of Chemistry, Northeast  
Normal University, Changchun 130024, P. R. China*

E-mail addresses: [liucg407@163.com](mailto:liucg407@163.com) or [liucg407@mail.nedu.edu.cn](mailto:liucg407@mail.nedu.edu.cn)

**Table S1.** Comparison of basis set effects on the dynamic HRS first hyperpolarizability of the ligand **5**

| Ligand | Basis set     | $\beta_{\text{HRS}}$ |
|--------|---------------|----------------------|
| 5      | 6-31G(d)      | 2.01                 |
|        | 6-31+G(d)     | 1.99                 |
|        | 6-31++G(d)    | 2.16                 |
|        | 6-311++G(d,p) | 2.06                 |
|        | aug-cc-pVDZ   | 2.14                 |

**Table S2** Average bond length of the key bond and dihedral angles of experimental and the calculated parameters

|              |       | Bond(Å)                    |        |        |                                |       |       |
|--------------|-------|----------------------------|--------|--------|--------------------------------|-------|-------|
| Bond         | Ni-S1 | Ni-S2                      | Ni-C11 | Ni-C12 | Ni-N1                          | Ni-N2 | R     |
| Experimental | 2.403 | 2.418                      | 2.345  | 2.368  | 2.094                          | 2.097 | 2.288 |
| Theoretical  | 2.544 | 2.542                      | 2.413  | 2.415  | 2.161                          | 2.161 | 2.373 |
|              |       | Dihedral Angles(°)         |        |        |                                |       |       |
|              |       | $\angle\text{C1-C6-C7-C8}$ |        |        | $\angle\text{C10-C11-C12-C14}$ |       |       |
| Experimental |       | 172.17°                    |        |        | 177.30°                        |       |       |
| Theoretical  |       | 163.78°                    |        |        | 167.33°                        |       |       |

**Table S3.** The static HRS first hyperpolarizability ( $\beta_{\text{HRS}}(0)$ ) and TDDFT result for the ligand **1** and corresponding metal complexes

| Compound<br>s          | $\beta_{\text{HRS}}(0)$ | Excite<br>d | E/(eV) | $\lambda/\text{nm}$ | $f_{os}$ | Major Contributions                                   |
|------------------------|-------------------------|-------------|--------|---------------------|----------|-------------------------------------------------------|
| <b>1</b>               | 34.44                   | 1           | 3.20   | 388.0               | 0.7360   | HOMO→LUMO (+89%)                                      |
| <b>Cu<sup>2+</sup></b> | 15.10                   | 1           | 0.91   | 1369.               | 0.0030   | $\beta$ HOMO-2→LUMO(+41%)<br>$\beta$ HOMO-            |
| <b>Ni<sup>2+</sup></b> | 14.44                   | 13          | 3.25   | 381.6               | 0.6245   | <i>a</i> HOMO→LUMO (+37%)<br>$\beta$ HOMO→LUMO (+35%) |
| <b>Cd<sup>2+</sup></b> | 33.36                   | 1           | 3.25   | 381.9               | 0.8180   | HOMO→LUMO+1(+80%)                                     |
| <b>Zn<sup>2+</sup></b> | 33.30                   | 1           | 3.24   | 383.2               | 0.8021   | HOMO→LUMO (+83%)                                      |
| <b>Mg<sup>2+</sup></b> | 15.21                   | 1           | 3.24   | 382.9               | 0.8120   | HOMO→LUMO (+86%)                                      |

**Table S4.** The static HRS first hyperpolarizability ( $\beta_{\text{HRS}}(0)$ ) and TDDFT result for the ligand **2** and corresponding metal complexes

| Compound<br>s          | $\beta_{\text{HRS}}(0)$ | Excite<br>d<br>state | E/(eV) | $\lambda/\text{nm}$ | $f_{os}$   | Major Contributions                                             |
|------------------------|-------------------------|----------------------|--------|---------------------|------------|-----------------------------------------------------------------|
| <b>2</b>               | 17.62                   | 1                    | 2.99   | 414.6               | 0.566<br>7 | HOMO→LUMO(+89%)                                                 |
| <b>Cu<sup>2+</sup></b> | 19.30                   | 1                    | 0.92   | 1348.<br>7          | 0.003<br>0 | $\beta$ HOMO-<br>3→LUMO(+45%)<br>$\beta$ HOMO-<br>36→LUMO(+28%) |
| <b>Ni<sup>2+</sup></b> | 19.22                   | 2                    | 0.82   | 1506.<br>2          | 0.068<br>3 | HOMO→LUMO (+75%)                                                |
| <b>Cd<sup>2+</sup></b> | 19.58                   | 1                    | 2.96   | 419.2               | 0.514<br>3 | HOMO→LUMO(+90%)                                                 |
| <b>Zn<sup>2+</sup></b> | 19.49                   | 1                    | 2.96   | 418.6               | 0.520<br>9 | HOMO→LUMO(+90%)                                                 |
| <b>Mg<sup>2+</sup></b> | 20.27                   | 1                    | 2.96   | 419.5               | 0.508<br>0 | HOMO→LUMO(+90%)                                                 |

**Table S5.** The static HRS first hyperpolarizability ( $\beta_{\text{HRS}}(0)$ ) and TDDFT result for the ligand **3** and corresponding metal complexes

| Compounds              | $\beta_{\text{HRS}}(0)$ | Excited<br>state | E(ev) | $\lambda/\text{nm}$ | $f_{os}$ | Major Contributions                              |
|------------------------|-------------------------|------------------|-------|---------------------|----------|--------------------------------------------------|
| <b>3</b>               | 31.52                   | 1                | 2.86  | 432.8               | 1.4279   | HOMO→LUMO(+84%)                                  |
| <b>Ni<sup>2+</sup></b> | 13.89                   | 13               | 2.96  | 419.4               | 0.6673   | <i>a</i> HOMO-1→LUMO<br>$\beta$ HOMO→LUMO (+30%) |

|                        |       |    |      |       |        |                                                  |
|------------------------|-------|----|------|-------|--------|--------------------------------------------------|
| <b>Cu<sup>2+</sup></b> | 14.95 | 17 | 2.97 | 417.8 | 0.7249 | $\beta$ HOMO→LUMO+1(+28%)<br>$a$ HOMO→LUMO(+28%) |
| <b>Cd<sup>2+</sup></b> | 13.88 | 1  | 2.97 | 418.0 | 0.6987 | HOMO→LUMO(+59%)<br>HOMO-1→LUMO+3(+16%)           |
| <b>Zn<sup>2+</sup></b> | 15.32 | 1  | 2.96 | 418.9 | 0.6842 | HOMO→LUMO (+57%)                                 |
| <b>Mg<sup>2+</sup></b> | 14.42 | 1  | 2.96 | 419.0 | 0.6691 | HOMO→LUMO (+58%)                                 |

**Table S6.** The static HRS first hyperpolarizability ( $\beta_{\text{HRS}}(0)$ ) and TDDFT result for the ligand **4** and corresponding metal complexes

| Compound<br>s          | $\beta_{\text{HRS}}(0)$ | Excite<br>d | $E(\text{ev})$ | $\lambda/\text{nm}$ | $f_{os}$ | Major Contributions                        |
|------------------------|-------------------------|-------------|----------------|---------------------|----------|--------------------------------------------|
| <b>4</b>               | 5.48                    | 1           | 3.06           | 405.4               | 0.6358   | HOMO→LUMO(+96%)                            |
| <b>Ni<sup>2+</sup></b> | 4.79                    | 9           | 3.02           | 410.1               | 0.6868   | $\beta$ HOMO→LUMO(+48%)                    |
| <b>Cu<sup>2+</sup></b> | 11.52                   | 1           | 0.89           | 1396.               | 0.0028   | $\beta$ HOMO-2→LUMO(+47%)<br>$\beta$ HOMO- |
| <b>Cd<sup>2+</sup></b> | 11.42                   | 1           | 3.06           | 405.2               | 0.6826   | HOMO→LUMO(+97%)                            |
| <b>Zn<sup>2+</sup></b> | 11.47                   | 1           | 3.07           | 404.4               | 0.6898   | HOMO→LUMO(+97%)                            |
| <b>Mg<sup>2+</sup></b> | 10.66                   | 1           | 3.06           | 405.8               | 0.6880   | HOMO→LUMO(+97%)                            |

**Table S7.** The static HRS first hyperpolarizability ( $\beta_{\text{HRS}}(0)$ ) and TDDFT result for the ligand **6** and corresponding metal complexes

| Compound<br>s          | $\beta_{\text{HRS}}(0)$ | Excite<br>d | $E(\text{ev})$ | $\lambda/\text{nm}$ | $f_{os}$ | Major Contributions                                                                    |
|------------------------|-------------------------|-------------|----------------|---------------------|----------|----------------------------------------------------------------------------------------|
| <b>6</b>               | 5.48                    | 7           | 4.83           | 256.8               | 0.3591   | HOMO→LUMO+7(+33%)                                                                      |
| <b>Ni<sup>2+</sup></b> | 4.79                    | 27          | 4.28           | 290.0               | 0.1293   | $\beta$ HOMO→LUMO+8<br>$\beta$ HOMO→LUMO+10<br>$a$ HOMO→LUMO+9<br>$a$ HOMO→LUMO+7(+13) |
| <b>Cu<sup>2+</sup></b> | 2.93                    | 1           | 0.43           | 2878.               | 0.0008   | $\beta$ HOMO-<br>$\beta$ HOMO-                                                         |
| <b>Cd<sup>2+</sup></b> | 1.78                    | 9           | 4.88           | 254.3               | 0.5798   | HOMO→LUMO+7(+48%)<br>HOMO-1→LUMO+3                                                     |
| <b>Zn<sup>2+</sup></b> | 1.81                    | 9           | 4.88           | 254.3               | 0.5774   | HOMO→LUMO+7<br>HOMO-1→LUMO+3                                                           |
| <b>Mg<sup>2+</sup></b> | 2.25                    | 8           | 4.86           | 255.0               | 0.2871   | HOMO→LUMO+7<br>HOMO-7→LUMO                                                             |

## Ligand 5

|   |             |             |             |
|---|-------------|-------------|-------------|
| C | 1.73003700  | 1.18921800  | -0.32114300 |
| C | 3.84831600  | 0.17084500  | 0.78491600  |
| C | 6.50116700  | 0.15035300  | 1.20377800  |
| H | 6.40008300  | 1.22701300  | 1.04568400  |
| H | 7.30624100  | -0.02126400 | 1.92585500  |
| C | 6.82799400  | -0.58178600 | -0.08996800 |
| H | 7.08056800  | -1.62388600 | 0.11802300  |
| H | 7.68363100  | -0.10211400 | -0.57792700 |
| C | 4.10303200  | 0.14260100  | -0.54014000 |
| C | 0.42438300  | 1.41627000  | -0.57698500 |
| C | -1.93598700 | 1.25494700  | -1.71220700 |
| C | -2.18863600 | 1.29450500  | -0.38006100 |
| C | -2.55586300 | -0.53884200 | -3.78087700 |
| H | -1.59722400 | -0.35293000 | -4.27106900 |
| H | -2.43412200 | -1.28062200 | -2.99102000 |
| C | -3.60190300 | -0.99861600 | -4.76264900 |
| C | -3.64379600 | -0.48564300 | -6.06572000 |
| H | -2.90611800 | 0.24440500  | -6.38609100 |
| C | -4.63996800 | -0.92649300 | -6.93408000 |
| H | -4.69291400 | -0.54585100 | -7.95040500 |
| C | -5.56249400 | -1.86458500 | -6.47408100 |
| H | -6.35590400 | -2.23964100 | -7.11326800 |
| C | -5.44153100 | -2.31721800 | -5.15968200 |
| H | -6.14149400 | -3.05111500 | -4.76392700 |
| C | -3.62863400 | -0.29576900 | 1.45266100  |
| H | -2.85196700 | -0.13801500 | 2.20360300  |
| H | -4.59376700 | -0.31107500 | 1.97522100  |
| C | -3.37396500 | -1.62046700 | 0.75992200  |
| C | -3.92498200 | -1.95173400 | -0.48361300 |
| H | -4.53023000 | -1.23508700 | -1.02860700 |
| C | -3.65839000 | -3.20876700 | -1.02310800 |
| H | -4.05757400 | -3.46651100 | -1.99987500 |
| C | -2.85988100 | -4.09541500 | -0.30035400 |
| H | -2.62101100 | -5.08383100 | -0.68185700 |
| C | -2.35896200 | -3.67382100 | 0.93092700  |

|   |             |             |             |
|---|-------------|-------------|-------------|
| H | -1.72579300 | -4.33137200 | 1.52483700  |
| N | -4.49199100 | -1.90092500 | -4.31440200 |
| N | -2.59839400 | -2.46607000 | 1.45604800  |
| S | 2.41502600  | 1.08611400  | 1.31966900  |
| S | 4.95541600  | -0.45407000 | 2.00611600  |
| S | 5.46402300  | -0.62446700 | -1.35880000 |
| S | 2.96532300  | 1.02276900  | -1.59616900 |
| S | -0.25190400 | 1.57525900  | -2.21542000 |
| S | -0.80480600 | 1.65766600  | 0.68635600  |
| S | -3.14069700 | 1.04824800  | -2.98734800 |
| S | -3.78787400 | 1.19003700  | 0.36503300  |

### Ni<sup>2+</sup>

|    |             |             |             |
|----|-------------|-------------|-------------|
| Ni | -5.78744300 | -0.48470500 | -1.04018400 |
| Cl | -7.03040500 | -1.13516400 | -2.93971200 |
| Cl | -7.17263800 | -0.46746300 | 0.87470400  |
| S  | -3.93039600 | 0.26915800  | 0.61856100  |
| S  | -0.94501000 | 0.77435800  | 0.42405300  |
| S  | 2.36156000  | 0.63504900  | 0.49349100  |
| S  | 5.01283500  | -0.69276700 | 0.93080200  |
| S  | 5.20527600  | -0.84813600 | -2.47897400 |
| S  | 2.42652400  | 0.40145600  | -2.46296100 |
| S  | -0.89179400 | 0.56566600  | -2.54361600 |
| S  | -3.80780100 | -0.31308500 | -2.73376000 |
| N  | -5.95960200 | 1.60573300  | -1.54682900 |
| N  | -4.97811500 | -2.41625100 | -0.52463600 |
| C  | -6.72814100 | 2.40674800  | -0.79011800 |
| H  | -7.26175500 | 1.90656300  | 0.01261100  |
| C  | -6.82430700 | 3.77852300  | -1.01412400 |
| H  | -7.46107100 | 4.38427600  | -0.37804000 |
| C  | -6.08251500 | 4.34002200  | -2.05018500 |
| H  | -6.11892200 | 5.40785900  | -2.24677300 |
| C  | -5.28818800 | 3.50695800  | -2.83662900 |
| H  | -4.70137500 | 3.90780400  | -3.65745300 |
| C  | -5.26198200 | 2.13624200  | -2.56918300 |
| C  | -4.51396600 | 1.20867400  | -3.49773800 |
| H  | -3.73926700 | 1.74050400  | -4.05504500 |
| H  | -5.22474400 | 0.76931300  | -4.20844200 |
| C  | -2.44531500 | 0.25242900  | -1.73726400 |
| C  | 0.06234700  | 0.61170200  | -1.03831400 |
| C  | 1.41032000  | 0.54462000  | -1.00959900 |

|   |             |             |             |
|---|-------------|-------------|-------------|
| C | 3.78343300  | -0.17279600 | -0.22061600 |
| C | 6.59646300  | -0.61767100 | -0.04657500 |
| H | 7.29304000  | -0.02299200 | 0.55458600  |
| H | 6.96854100  | -1.64285300 | -0.10505000 |
| C | 6.48096800  | -0.01713900 | -1.44044600 |
| H | 7.43206700  | -0.14822400 | -1.96692500 |
| H | 6.24696700  | 1.04982600  | -1.40486700 |
| C | 3.81014400  | -0.27821300 | -1.56620500 |
| C | -2.46393700 | 0.33778300  | -0.38406800 |
| C | -3.86809300 | -1.39004200 | 1.41727100  |
| H | -2.92948800 | -1.50244900 | 1.96485300  |
| H | -4.69512600 | -1.31250500 | 2.13338900  |
| C | -4.11875000 | -2.56564500 | 0.50130700  |
| C | -3.52343100 | -3.79786600 | 0.78029700  |
| H | -2.82091700 | -3.88342300 | 1.60362800  |
| C | -3.85250500 | -4.90613600 | 0.00107800  |
| H | -3.40263300 | -5.87335400 | 0.20671600  |
| C | -4.76357400 | -4.74865900 | -1.04006100 |
| H | -5.05427900 | -5.58138000 | -1.67179100 |
| C | -5.29750300 | -3.48353500 | -1.27540000 |
| H | -5.99569400 | -3.28481700 | -2.08311000 |

### Cu<sup>2+</sup>

|    |             |             |             |
|----|-------------|-------------|-------------|
| Cl | -6.68800600 | -1.72461100 | -2.27806600 |
| Cl | -6.81785800 | -0.86868500 | 1.92967400  |
| S  | -3.50797900 | -0.17792000 | 1.39372300  |
| S  | -0.51432200 | 0.25740500  | 1.19858900  |
| S  | 2.79517300  | 0.18159200  | 1.28225500  |
| S  | 5.45829000  | -1.09833800 | 1.78928100  |
| S  | 5.66706300  | -1.40525800 | -1.60862400 |
| S  | 2.87431700  | -0.18609100 | -1.65988900 |
| S  | -0.44963300 | -0.10497700 | -1.75452700 |
| S  | -3.37147100 | -0.94548300 | -1.91631800 |
| N  | -5.80790200 | 0.93753200  | -0.73057800 |
| N  | -4.93692400 | -2.91559200 | 0.34242600  |
| C  | -6.59644000 | 1.76216900  | -0.01968600 |
| H  | -7.22872400 | 1.28020800  | 0.71762800  |
| C  | -6.58299600 | 3.14462000  | -0.18519300 |
| H  | -7.24362500 | 3.76227500  | 0.41370200  |
| C  | -5.69833800 | 3.69522600  | -1.10639400 |
| H  | -5.63910400 | 4.77012300  | -1.25187100 |
| C  | -4.88553200 | 2.83889200  | -1.84618300 |

|    |             |             |             |
|----|-------------|-------------|-------------|
| H  | -4.19100800 | 3.23289800  | -2.58112000 |
| C  | -4.97242200 | 1.45590900  | -1.65943000 |
| C  | -4.19711000 | 0.55727500  | -2.59559600 |
| H  | -3.47216200 | 1.14576900  | -3.16212700 |
| H  | -4.90358900 | 0.10028000  | -3.29864400 |
| C  | -2.01326700 | -0.34752900 | -0.94301100 |
| C  | 0.49967100  | 0.03988300  | -0.25200300 |
| C  | 1.84859100  | 0.00290700  | -0.21718300 |
| C  | 4.22792500  | -0.64369900 | 0.61098200  |
| C  | 7.04521300  | -1.05060800 | 0.81602200  |
| H  | 7.73348700  | -0.42252700 | 1.39237500  |
| H  | 7.42823400  | -2.07338800 | 0.80426600  |
| C  | 6.92910500  | -0.51433000 | -0.60383200 |
| H  | 7.88395400  | -0.65758800 | -1.12034100 |
| H  | 6.68276400  | 0.55040200  | -0.61671300 |
| C  | 4.26121600  | -0.81025700 | -0.72834100 |
| C  | -2.03731300 | -0.19389900 | 0.40449100  |
| C  | -3.58678700 | -1.85644500 | 2.14902100  |
| H  | -2.65503700 | -2.06099900 | 2.68099900  |
| H  | -4.39121900 | -1.72367300 | 2.88165300  |
| C  | -3.94116500 | -3.02055200 | 1.25172900  |
| C  | -3.28142900 | -4.23710300 | 1.44916100  |
| H  | -2.46998400 | -4.29046900 | 2.16786900  |
| C  | -3.67754900 | -5.36792000 | 0.73802800  |
| H  | -3.17186400 | -6.31715400 | 0.89052900  |
| C  | -4.72923600 | -5.25359200 | -0.16515600 |
| H  | -5.08249700 | -6.10145400 | -0.74217100 |
| C  | -5.32315500 | -4.00663300 | -0.34117000 |
| H  | -6.11521800 | -3.84633000 | -1.06420700 |
| Cu | -5.80545100 | -1.08589800 | -0.19134700 |

### Cd<sup>2+</sup>

|    |             |             |             |
|----|-------------|-------------|-------------|
| Cl | -7.03783600 | -2.07867100 | -2.35883000 |
| Cl | -7.29084400 | -0.75001300 | 1.99545600  |
| S  | -3.76247600 | -0.30323800 | 1.45986400  |
| S  | -0.78972200 | 0.17230900  | 1.23609800  |
| S  | 2.52145500  | 0.10749200  | 1.30745900  |
| S  | 5.19775900  | -1.16288900 | 1.76755400  |
| S  | 5.39249400  | -1.37791300 | -1.63737500 |
| S  | 2.58967700  | -0.18169500 | -1.64402500 |
| S  | -0.73292400 | -0.10339900 | -1.72281100 |
| S  | -3.63710200 | -0.96535900 | -1.92227100 |



|    |             |             |             |
|----|-------------|-------------|-------------|
| N  | -5.78431100 | 1.17987800  | -0.81880600 |
| N  | -4.79053600 | -3.15907200 | 0.42037400  |
| C  | -6.35876300 | 2.09465300  | -0.02167400 |
| H  | -7.02781500 | 1.70128300  | 0.73947700  |
| C  | -6.10184800 | 3.46057900  | -0.13436400 |
| H  | -6.59277100 | 4.16059200  | 0.53346900  |
| C  | -5.19806500 | 3.88701800  | -1.10359600 |
| H  | -4.95917200 | 4.94071400  | -1.21686200 |
| C  | -4.59596900 | 2.93678700  | -1.92834100 |
| H  | -3.88571500 | 3.23400900  | -2.69366800 |
| C  | -4.92021400 | 1.58692500  | -1.76849200 |
| C  | -4.34267600 | 0.55416500  | -2.70635500 |
| H  | -3.60313500 | 1.00536200  | -3.37130500 |
| H  | -5.14234300 | 0.11578200  | -3.31656400 |
| C  | -2.29209600 | -0.39168000 | -0.91465100 |
| C  | 0.22104400  | -0.00034700 | -0.22133800 |
| C  | 1.57016500  | -0.03463900 | -0.19251600 |
| C  | 3.95760600  | -0.68789400 | 0.60793700  |
| C  | 6.77970300  | -1.07132500 | 0.78882100  |
| H  | 7.46321200  | -0.45019500 | 1.37816700  |
| H  | 7.17427900  | -2.08900000 | 0.74949100  |
| C  | 6.65083100  | -0.50023200 | -0.61619800 |
| H  | 7.60437300  | -0.62055600 | -1.14085200 |
| H  | 6.39363100  | 0.56187700  | -0.60062000 |
| C  | 3.98587300  | -0.81865900 | -0.73547400 |
| C  | -2.31325500 | -0.27302800 | 0.43765300  |
| C  | -3.72339300 | -1.95876300 | 2.28095100  |
| H  | -2.83891500 | -2.03347900 | 2.91730200  |
| H  | -4.61357600 | -1.89831300 | 2.91941900  |
| C  | -3.82669500 | -3.15326400 | 1.36143000  |
| C  | -2.96430500 | -4.24013500 | 1.52718800  |
| H  | -2.18673600 | -4.20187800 | 2.28372900  |
| C  | -3.11946000 | -5.36563000 | 0.71787100  |
| H  | -2.45864800 | -6.21980000 | 0.83553800  |
| C  | -4.12700200 | -5.37024500 | -0.24287700 |
| H  | -4.28365900 | -6.21967100 | -0.89933800 |
| C  | -4.93490200 | -4.24012700 | -0.36232600 |
| H  | -5.71459300 | -4.17314800 | -1.11695400 |
| Cd | -6.20194000 | -1.19880600 | -0.19208200 |

### Zn<sup>2+</sup>

|    |             |             |             |
|----|-------------|-------------|-------------|
| Cl | -6.96220300 | -1.86204900 | -2.18430000 |
|----|-------------|-------------|-------------|

|    |             |             |             |
|----|-------------|-------------|-------------|
| Cl | -7.11597000 | -0.91629900 | 1.84186400  |
| S  | -3.67315400 | -0.22906900 | 1.43193700  |
| S  | -0.69772600 | 0.24512100  | 1.20526200  |
| S  | 2.61222600  | 0.16166400  | 1.28701600  |
| S  | 5.27148600  | -1.12687600 | 1.78985500  |
| S  | 5.47585700  | -1.42931800 | -1.61012100 |
| S  | 2.68737700  | -0.20098500 | -1.65577600 |
| S  | -0.63614100 | -0.10592600 | -1.74597100 |
| S  | -3.54361100 | -0.96649100 | -1.92526100 |
| N  | -5.73361000 | 1.04827800  | -0.74529200 |
| N  | -4.77923700 | -2.99918600 | 0.35228600  |
| C  | -6.38091700 | 1.92494200  | 0.04155100  |
| H  | -6.99218600 | 1.48612800  | 0.82491100  |
| C  | -6.26670400 | 3.30513000  | -0.11177900 |
| H  | -6.81252400 | 3.96858100  | 0.55065300  |
| C  | -5.43323400 | 3.79561600  | -1.11278000 |
| H  | -5.30380800 | 4.86449800  | -1.25735600 |
| C  | -4.76099300 | 2.88809000  | -1.92997000 |
| H  | -4.10435200 | 3.23335400  | -2.72242000 |
| C  | -4.94341800 | 1.51686200  | -1.73192500 |
| C  | -4.29962800 | 0.53563700  | -2.68135400 |
| H  | -3.57325000 | 1.03871500  | -3.32338900 |
| H  | -5.07236300 | 0.08061900  | -3.31370800 |
| C  | -2.19710500 | -0.36943100 | -0.93339500 |
| C  | 0.31539600  | 0.03081500  | -0.24531200 |
| C  | 1.66420500  | -0.01066500 | -0.21187100 |
| C  | 4.04201100  | -0.66668700 | 0.61290400  |
| C  | 6.85730800  | -1.08785200 | 0.81447300  |
| H  | 7.55027600  | -0.46569700 | 1.39159300  |
| H  | 7.23354000  | -2.11309100 | 0.79988100  |
| C  | 6.74305400  | -0.54737700 | -0.60393600 |
| H  | 7.69672200  | -0.69463200 | -1.12147500 |
| H  | 6.50254400  | 0.51870700  | -0.61413300 |
| C  | 4.07354100  | -0.83081200 | -0.72672500 |
| C  | -2.21994500 | -0.21862600 | 0.41526200  |
| C  | -3.66086100 | -1.88327500 | 2.24254200  |
| H  | -2.75789600 | -1.99761200 | 2.84635700  |
| H  | -4.52674400 | -1.80177900 | 2.91114900  |
| C  | -3.84446100 | -3.06616200 | 1.32123200  |
| C  | -3.08752000 | -4.22292700 | 1.52409400  |
| H  | -2.32975800 | -4.23958900 | 2.30119400  |
| C  | -3.32148300 | -5.34449700 | 0.72974300  |
| H  | -2.74260400 | -6.25173600 | 0.87783600  |
| C  | -4.30344700 | -5.27564500 | -0.25438100 |

|    |             |             |             |
|----|-------------|-------------|-------------|
| H  | -4.52310300 | -6.11954500 | -0.89972300 |
| C  | -5.00228300 | -4.08084000 | -0.41363000 |
| H  | -5.75756300 | -3.95833100 | -1.18467400 |
| Zn | -6.01705400 | -1.15338700 | -0.18825700 |

### Mg<sup>2+</sup>

|    |             |             |             |
|----|-------------|-------------|-------------|
| Cl | -6.87119900 | -1.82891300 | -2.20634500 |
| Cl | -7.03770400 | -0.91911200 | 1.84111500  |
| S  | -3.67827600 | -0.27149600 | 1.44541600  |
| S  | -0.69914700 | 0.22039600  | 1.23402300  |
| S  | 2.61055800  | 0.12438100  | 1.30610200  |
| S  | 5.27332200  | -1.17196000 | 1.77001600  |
| S  | 5.46739100  | -1.39487900 | -1.63552100 |
| S  | 2.67751500  | -0.16939600 | -1.64481000 |
| S  | -0.64290000 | -0.05669500 | -1.72690100 |
| S  | -3.55396000 | -0.92647400 | -1.90981000 |
| N  | -5.69714800 | 1.07368300  | -0.74115800 |
| N  | -4.73469300 | -3.01091900 | 0.34686800  |
| C  | -6.37213300 | 1.94023500  | 0.03709100  |
| H  | -6.95785800 | 1.49037000  | 0.83395300  |
| C  | -6.31725500 | 3.32049500  | -0.14352400 |
| H  | -6.88293100 | 3.97309200  | 0.51290600  |
| C  | -5.51665500 | 3.82648100  | -1.16359000 |
| H  | -5.43432700 | 4.89695800  | -1.32943200 |
| C  | -4.81558800 | 2.93297600  | -1.97195100 |
| H  | -4.18300900 | 3.29056100  | -2.77836100 |
| C  | -4.93869200 | 1.56014200  | -1.74542000 |
| C  | -4.26799600 | 0.58655400  | -2.68497400 |
| H  | -3.51329800 | 1.08695600  | -3.29579300 |
| H  | -5.02128200 | 0.14301500  | -3.34827700 |
| C  | -2.19935200 | -0.34689800 | -0.91644700 |
| C  | 0.31041100  | 0.03810800  | -0.22377800 |
| C  | 1.65915200  | -0.00959000 | -0.19416800 |
| C  | 4.03923300  | -0.68611300 | 0.60853000  |
| C  | 6.85637900  | -1.10236000 | 0.79137400  |
| H  | 7.54762500  | -0.48939800 | 1.38023100  |
| H  | 7.23776100  | -2.12509500 | 0.75342600  |
| C  | 6.73540500  | -0.53129200 | -0.61438600 |
| H  | 7.68772300  | -0.66401800 | -1.13826500 |
| H  | 6.49136200  | 0.53392900  | -0.60029400 |
| C  | 4.06689000  | -0.81899100 | -0.73464500 |
| C  | -2.21973700 | -0.23009600 | 0.43501000  |

|    |             |             |             |
|----|-------------|-------------|-------------|
| C  | -3.62878300 | -1.92411700 | 2.25913800  |
| H  | -2.70940600 | -2.02626900 | 2.83998500  |
| H  | -4.47889200 | -1.85114500 | 2.94869200  |
| C  | -3.82551700 | -3.10637500 | 1.33907200  |
| C  | -3.11333500 | -4.28567500 | 1.56894000  |
| H  | -2.37581000 | -4.32249500 | 2.36459400  |
| C  | -3.36682300 | -5.40442000 | 0.77663300  |
| H  | -2.82356400 | -6.32998600 | 0.94502300  |
| C  | -4.32179500 | -5.30940000 | -0.23167400 |
| H  | -4.55476500 | -6.15031000 | -0.87614800 |
| C  | -4.97504900 | -4.09302900 | -0.41679000 |
| H  | -5.70823100 | -3.95073900 | -1.20591100 |
| Mg | -5.87493400 | -1.12431900 | -0.19508300 |
